# Supplementary material
Source: Springer Nature journal article supplement (https://www.springermedizin.de/resource/supplementary/12985_2010_892_MOESM3_ESM.pdf/9608678)

**No. of samples  
N = 200**

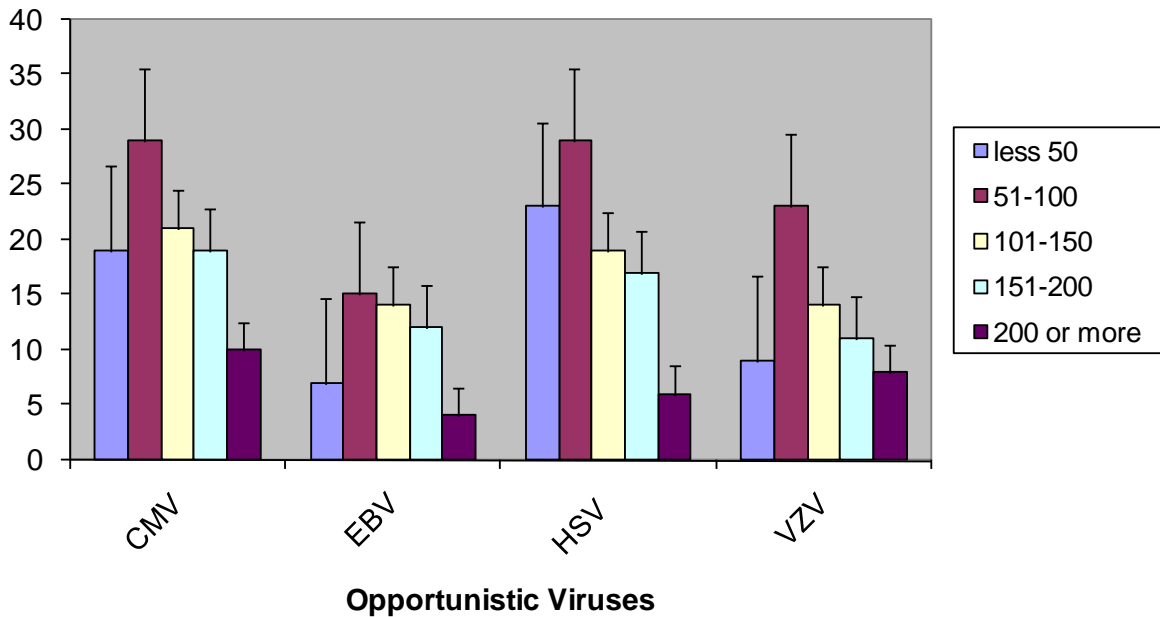

Supplement: MOESM3 [file 9608678]
